# Supplementary material
Source: Elsevier journal article supplement (https://www.sciencedirect.com/science/article/pii/S0210480621000917)
Supplement: mmc1 [file S0210480621000917:mmc1.doc]

|  | **Group A**  **< 75 y.o.**  **n = 155** | **Group B**  **> 75 y.o.**  **n = 51** | **p-value** |
| --- | --- | --- | --- |
| Age, years | 66 (59-70) | 79 (77-82) | **< 0.001** |
| ASA score |  |  | 0.07 |
| no. 1-2 | 121 (78.1) | 31 (60.8) |  |
| no. 3-4 | 34 (21.9) | 20 (39.2) |  |
| Charlson's Comorbidity Index |  |  | 0.1 |
| no. 0 | 131 (84.5) | 41 (80.4) |  |
| no. 1 | 22 (14.2) | 3 (5.9) |  |
| no. >2 | 2 (1.3) | 7 (13.7) |  |
| no. Hypertension | 54 (34.8) | 19 (37.2) | 0.8 |
| no. Normal ejaculation | 135 (87.1) | 37 (72.5) | 0.08 |
| no. Intaking antiplatelet / anticoag. | 25 (16.1) | 16 (31.4) | 0.07 |
| no. Indwelling catheter | 22 (14.2) | 14 (27.4) | 0.1 |
| PSA, ng/ml | 2.6 (1.1-5.2) | 2.4 (1.1-3.9) | 0.3 |
| Hemoglobin, g/dl | 14.1 (13.2-15.2) | 13.9 (13.0-14.7) | 0.5 |
| Prostate Volume, ml | 33 (22-65) | 45 (35-71) | 0.4 |
| no. Median Lobe | 23 (14.8) | 9 (17.6) | 0.5 |
| Qmax, ml/s | 12.2 (6.7-17.1) | 9.1 (7.3-12.0) | **0.04** |
| Qave, ml/s | 5.5 (3.6-7.4) | 4.1 (2.7-5.5) | 0.2 |
| PVR, ml | 90 (65-125) | 100 (65-150) | 0.3 |
| IPSS | 21 (16-28) | 22.5 (16-26) | 0.8 |
| QoL | 4 (3-5) | 4 (3-5) | 0.9 |

**Supplementary Table 1.** **Baseline characteristics of patients before propensity-score matching.** Inter-Quartile Range (IQR) and percentages were reported in brackets, as appropriate. ASA: American Society of Anesthesiologists; PSA: Prostate Specific Antigen; Qmax: Maximum Urinary Flow; Qave: Average Urinary Flow; PVR: Post-Voiding Residual volume; IPSS: International Prostate Symptom score; QoL: Quality of Life
